# Supplementary material
Source: PubMed Central journal article supplement (PMC7300836)
Supplement: jmm-60-1708-s001.pdf [file jmm-60-1708-s001.pdf]

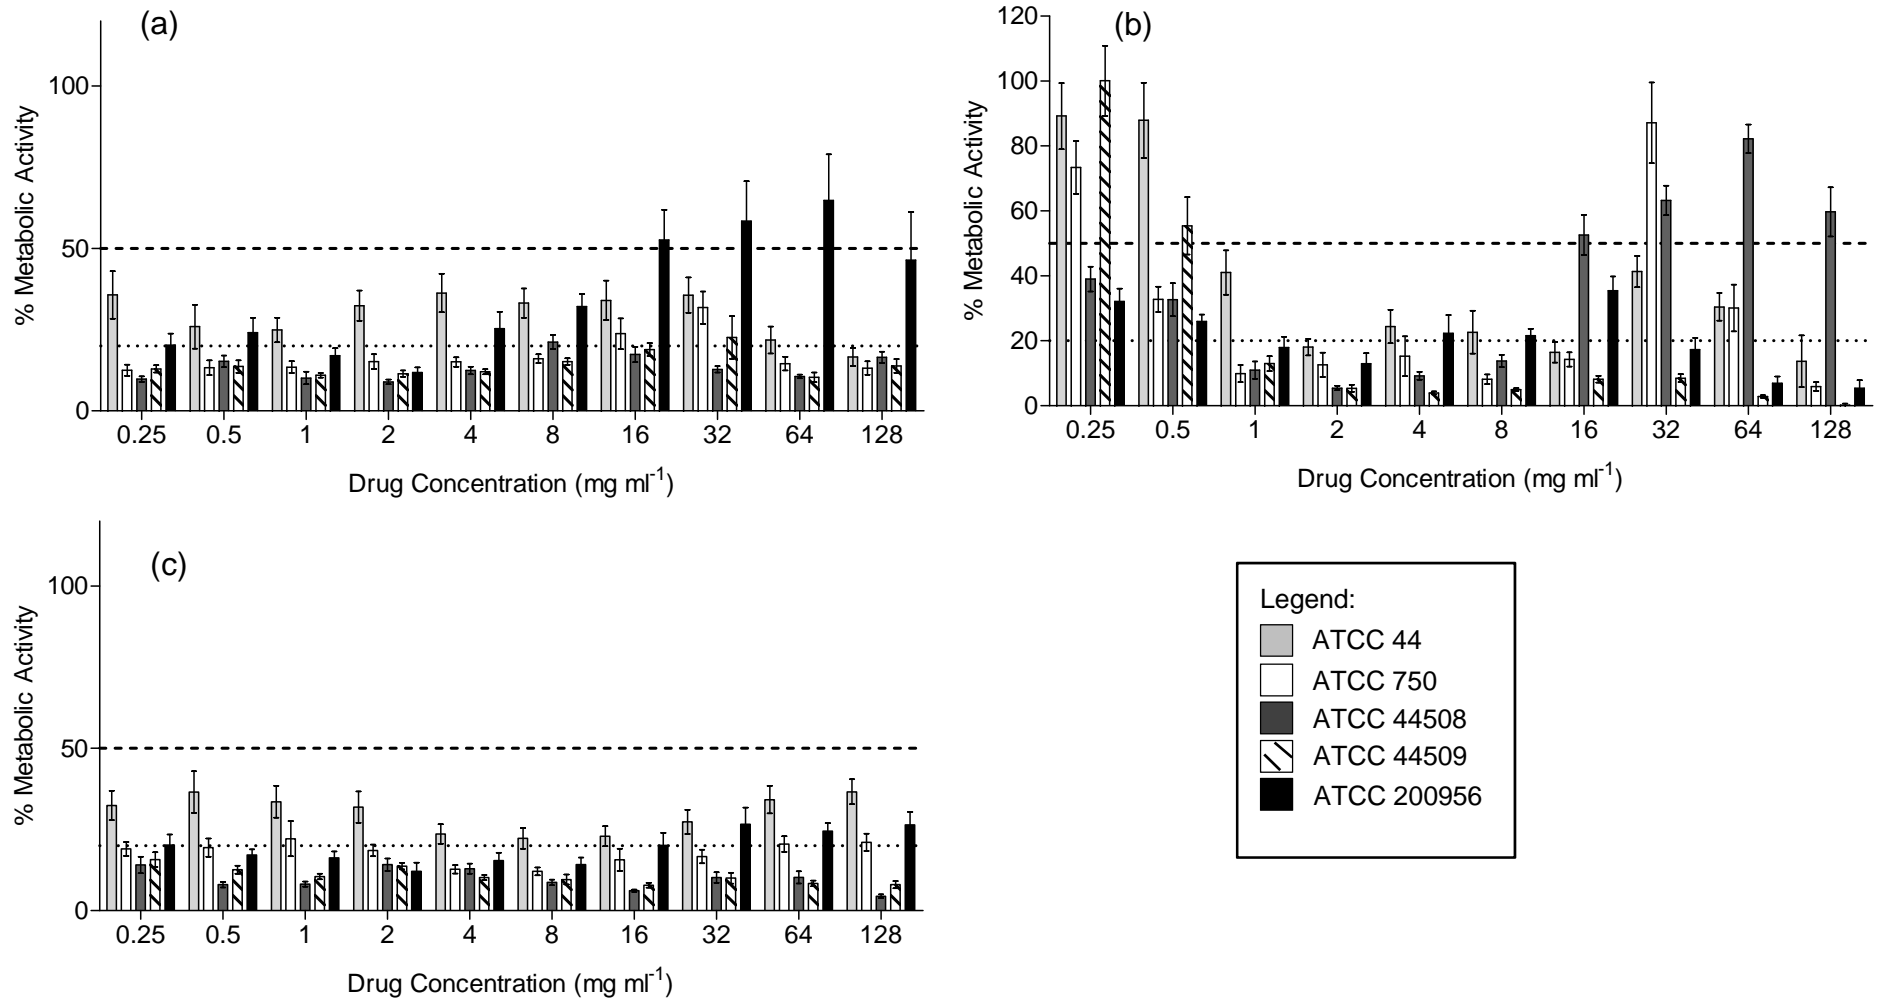

**Supplementary Fig. S1.** Comparison of antifungal and paradoxical activity of echinocandins in *C. tropicalis* biofilms. The activity of the echinocandins anidulafungin (a), caspofungin (b) and micafungin (c) against *C. albicans* biofilms was assayed. Mature biofilms were incubated with RPMI 1640 containing anidulafungin, caspofungin or micafungin at doubling dilutions for 24 h. Three replicates of each biofilm were used for each condition and drug-free biofilm wells containing RPMI only were used as controls. The metabolic activity of the biofilm after treatment was assessed using the XTT-reduction assay. The inhibitory effect of the tested agent was expressed as the percentage of metabolic activity of the treated biofilm relative to the untreated biofilm (considered to be 100%). A paradoxical effect was defined as increased metabolic activity above SMIC<sub>50</sub> in the presence of an increasing concentration of antifungal agent.

**Ku, T. S. N., Bernardo, S. M. & Lee, S. A. (2011).** *In vitro* assessment of the antifungal and paradoxical activity of different echinocandins against *Candida tropicalis* biofilms. *J Med Microbiol* **60**, 1708-1710.
